# Supplementary material for: IGH 3’RR recombination uncovers a non-germinal center imprint and c-MYC-dependent IGH rearrangement in unmutated chronic lymphocytic leukemia
Source: PubMed Central journal article supplement — Haematologica. 2023 Jul 27;109(2):466–78. doi: 10.3324/haematol.2023.282897 (PMC10828775; doi:10.3324/haematol.2023.282897), 2023-07-27

# IGH 3'RR recombination uncovers a non-germinal center imprint and c-MYC-dependent IGH rearrangement in unmutated chronic lymphocytic leukemia

Israa Al Jamal,<sup>1,2</sup> Milène Parquet,<sup>1\*</sup> Kenza Guiyedi,<sup>1\*</sup> Said Aoufouchi,<sup>3,4\*</sup> Morwenna Le Guillou,<sup>3</sup> David Rizzo,<sup>1,5</sup> Justine Pollet,<sup>1</sup> Marine Dupont,<sup>1,5</sup> Mélanie Boulin,<sup>1,5</sup> Nathalie Faumont,<sup>1</sup> Hend Boutouil,<sup>1</sup> Fabrice Jardin,<sup>6</sup> Philippe Ruminy,<sup>6</sup> Chahrazed El Hamel,<sup>7</sup> Justine Lerat,<sup>8</sup> Samar Al Hamaoui,<sup>2</sup> Nehman Makdissy,<sup>2</sup> Jean Feuillard,<sup>1,5</sup> Nathalie Gachard<sup>1,5</sup> and Sophie Peron<sup>1</sup>

<sup>1</sup>Centre National de la Recherche Scientifique (CNRS), Unité Mixte de Recherche (UMR), 7276/INSERM U1262, Université de Limoges, Limoges, France; <sup>2</sup>Faculty of Sciences, GSBT Genomic Surveillance and Biotherapy Team, Mont Michel Campus, Lebanese University, Tripoli, Lebanon; <sup>3</sup>CNRS UMR9019, Gustave Roussy, B-cell and Genome Plasticity Team, Villejuif, France; <sup>4</sup>Université Paris-Saclay, Orsay, France; <sup>5</sup>Laboratoire d'Hématologie Biologique, Centre Hospitalier Universitaire de Limoges, Limoges, France; <sup>6</sup>Department of Henri-Becquerel Hematology Center and Normandie, INSERM U1245, Université de Rouen, Rouen, France; <sup>7</sup>Collection Biologique Hôpital de la Mère et de l'Enfant (CB-HME), Department of Pediatrics, Limoges University Hospital, Limoges, France and <sup>8</sup>Department of Otorinolaryngology, Limoges University Hospital, Limoges, France

\*MP, KG and SA contributed equally.

**Correspondence:** S. Peron  
[sophie.peron@unilim.fr](mailto:sophie.peron@unilim.fr)

**Received:** February 13, 2023.

**Accepted:** July 20, 2023.

**Early view:** July 27, 2023.

<https://doi.org/10.3324/haematol.2023.282897>

©2024 Ferrata Storti Foundation

Published under a CC BY-NC license

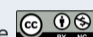

## Supplemental methods

### CSR, S $\mu$ -3'RRrec and intra-tumoral IGHV junction diversities

Shannon diversity index ( $H$ ) was used to estimate CSR, S $\mu$ -3'RRrec or intra-clonal IGHV diversities and was calculated considering the number of reads ( $n_i$ ) for each particular CSR, S $\mu$ -3'RRrec or IGHV rearrangement and the total read number ( $N$ ) of total CSR, S $\mu$ -3'RRrec or IGHV junctions:

$$H = - \sum_{i=1}^s P_i \ln(p_i) \text{ with } p_i = \frac{n_i}{N}$$

The  $H$  value ranges from 0 when S $\mu$ -3'RRrec junction diversity shrinks due to clonal dominance to high values for samples with higher diversity. CSR, S $\mu$ -3'RRrec, CLL IGHV sequencing data produced in this study have been deposited in the National Center for Biotechnology Information's BioProject (PRJNA830327).

### Intra-clonal IGHV analysis

For the analysis, Immcantation framework<sup>1</sup> was used via Immcantation/suite docker container v4.2 ( <https://hub.docker.com/r/immcantation/suite/> ). For each sample, output from IMGT/HighV-QUEST<sup>2</sup> was parsed via the imgt subcommand of MakeDb.py to generate a standardized tab-delimited database file. Then the non-productive sequences were removed with select subcommand of ParseDb.py. An automated detection of the clonal assignment threshold was then performed by shazam-threshold pipeline and DefineClones.py was launched on this new database with the use of the following argument: --act set to take into account ambiguous V gene and J gene calls when grouping similar sequences, --model hh\_s5f which corresponds to SHM targeting and substitution model for human Ig data<sup>3</sup>. Because the threshold was generated using length normalized distances, the --norm len argument is selected and the previously determined threshold was settings with the --dist argument. The IGHV, IGHD, IGHJ germline sequences that were used for the IMGT/HighV-QUEST alignment were downloaded from [http://www.imgt.org/download/V-QUEST/IMGT\\_V-QUEST\\_reference\\_directory/Homo\\_sapiens/IG/](http://www.imgt.org/download/V-QUEST/IMGT_V-QUEST_reference_directory/Homo_sapiens/IG/) (Release 202214-2) and were passed to CreateGermlines.py via the -r argument in order to reconstruct the germline V(D)J sequence, from which the Ig lineage and mutations can be inferred. Dplyr R packages and countClones function from alakazam R package were used to determine the number of distinct sequences in each clone to select the one with the higher value for downstream analysis. All sequences with a duplicate count lower than 1/1000 reads count of previously determined tumoral clone were discarded.

## PIM1 mutation analysis

For each library, alignment of sequenced reads with the reference sequence NM\_002648.4 using the Torrent Mapping Alignment Program (TMAP) for Ion Torrent Data and Super-maximal Exact Matching algorithm<sup>4</sup> results in BAM files. BAM files were processed to generate per-base nucleotide count table files consisting of matrices with  $n$  lines  $\times$  4 columns.  $n$  is the length of the sequenced DNA and the columns correspond to nucleotides (A, C, G, and T). The consensus sequence is the most frequently read nucleotide and corresponds to the sequence reference. Counts of mutated bases were calculated by addition of numbers of sequenced bases different from the nucleotide that was sequenced the most frequently. PIM1 sequencing data produced in this study have been deposited in the National Center for Biotechnology Information's BioProject (PRJNA830327).

## Supplemental Tables

### Supplemental Table1

| Count of $S\mu$ -3'RRrec junctions using CSReport   | Healthy PBMCs  | $S\mu$ -3'RRrec <sup>Low</sup> CLL PBMCs | $S\mu$ -3'RRrec <sup>High</sup> CLL PBMCs |
|-----------------------------------------------------|----------------|------------------------------------------|-------------------------------------------|
| $S\mu$ -3'RRrec positive samples /total samples (%) | 9/9<br>(100)   | 32/35<br>(91)                            | 12/12<br>(100)                            |
| Mean of $S\mu$ -3'RRrec junction (min-max)          | 26.6<br>(8-71) | 10.2<br>(0-24)                           | 58.5<br>(29-145)                          |

**Supplemental table 1.** Numbers of healthy volunteers and chronic lymphocytic leukemia (CLL) patients tested and  $S\mu$ -3'RR recombination ( $S\mu$ -3'RRrec) junction counts and intervals (minimum-maximum) obtained for each group. Based on the mean junction counts obtained in healthy peripheral blood mononuclear cells (PBMCs) we divided the CLL cohort into two groups:  $S\mu$ -3'RRrec<sup>Low</sup>  $\leq$ 27 junctions and  $S\mu$ -3'RRrec<sup>High</sup>  $>$  27 junctions per sample.

### Supplemental Table 2

| Samples *(P=0.05)             | $S\mu$ -3'RRrec <sup>Low</sup> CLL PBMCs | $S\mu$ -3'RRrec <sup>High</sup> CLL PBMCs |
|-------------------------------|------------------------------------------|-------------------------------------------|
| CSR <sup>Low</sup> CLL PBMCs  | 27                                       | 5                                         |
| CSR <sup>High</sup> CLL PBMCs | 8                                        | 7                                         |

**Supplemental table 2.** Repartition of patients between the two groups  $S\mu$ -3'RRrec<sup>Low</sup> and  $S\mu$ -3'RRrec<sup>High</sup>, and class switch recombination (CSR) (CSR<sup>Low</sup>,  $\leq$ 800 CSR junctions per sample, and CSR<sup>High</sup>,  $>$ 800 CSR junctions per sample). Statistical analyses were performed using Fisher's Exact Test \*P<0.05.

**Supplemental Table 3**

| Target and segment                  |                         | Primer name                   | Sequence 5'-3'                                     |                                                 |
|-------------------------------------|-------------------------|-------------------------------|----------------------------------------------------|-------------------------------------------------|
| CSR Junctions (CH12F3)              | PCR1                    | S $\mu$ 1                     | F:TAGTAAGCGAGGCTCTAAAAAGCA                         |                                                 |
|                                     |                         | S $\alpha$ 1                  | R:CAGCAGTGAGTTTAAACAATCC                           |                                                 |
|                                     | PCR2                    | S $\mu$ 2                     | F:GCTTGAGCCAAAATGAAGTAGACT                         |                                                 |
|                                     |                         | S $\alpha$ 2                  | R:CCTCAGTGCAACTCTATCTAGGTCT                        |                                                 |
| S $\mu$ -3'RRrec junctions (CH12F3) | PCR1                    | S $\mu$ 1                     | F:TAGTAAGCGAGGCTCTAAAAAGCA                         |                                                 |
|                                     |                         | LS2-R3                        | R:AACAAGAGGTGGGGAGTGTG                             |                                                 |
|                                     |                         | LS4-R3                        | R:CTATAGCCATGTGGGGCTGT                             |                                                 |
|                                     |                         | LS10-R3                       | R:GGGAGTGCCAGTGTCAACTT                             |                                                 |
|                                     | PCR2                    | S $\mu$ 2                     | F:GCTTGAGCCAAAATGAAGTAGACT                         |                                                 |
|                                     |                         | LS2-R2                        | R:TGTCCAGGCTGAGCTACCTT                             |                                                 |
|                                     |                         | LS4-R2                        | R:TTTACCAATCTCCCCACTG                              |                                                 |
|                                     |                         | LS10-R2                       | R:GTGAGTGTGTGGGGTTTGTG                             |                                                 |
| IgH locus Transcription             | S $\mu$                 | S $\mu$ g                     | F:GGTGTGGGTTTTACAGCTT<br>R:CCTCACCAAGTCCACCAAGT    |                                                 |
|                                     | S $\gamma$ 1            | S $\gamma$ 1-3                | F:CTGGGATGGAGAAGGGAAGG<br>R:CTGGTCTCAAGCACACGTTT   |                                                 |
|                                     | HS                      | HS1,2                         | F:GAGTTTTTCGGCATCTCTGGG<br>R:ACAGATCAGAGCCCTCACAC  |                                                 |
|                                     |                         | HS4                           | F:GTGTGTCTGAGGGTGAGTGA<br>R:ACACTGTCACACTCCACA     |                                                 |
|                                     | S $\gamma$ 3            | S $\gamma$ 3                  | F:AGCTGTGCAACTGGAGTCTT<br>R:TGAGCCACCTAATCCAAACC   |                                                 |
|                                     | IgM total (C $\mu$ )    | hIgM CH1                      | F :CAGAATGCGTCCTCCATGTG<br>R :GGTGGACTTGGTGAGGAAGA |                                                 |
|                                     | Surface IgM             | hslgM-CH4-For<br>hslgM-MB-Rev | F: AAGAGGAATGGAACACGGGG<br>R :ACAAGGTGACGGTGACTG   |                                                 |
|                                     | Telomere length         | Telomere                      | Telomere A                                         | CGGTTTGTGGGTTTGGGTTTGGGTTT<br>GGGTTTGGGTT       |
|                                     |                         |                               | Telomere B                                         | GGCTTGCCTTACCCTTACCCTTACCCTTAC<br>CCTTACCCT     |
|                                     | AICDA transcription     | AID                           |                                                    | F :GAGGCAAGAAGACTCTGG<br>R :GTGACATTCTGGAAGTTGC |
| PIM1 mutation                       | PIM1                    |                               | F :ATGAGTGGGTGGGGTGAGG<br>R :ATCGAGCCAGGCGGCC      |                                                 |
| Internal control                    | Human Beta globin (hbg) | CD19                          | F:AGACTCCTTCTCCAACGGTA<br>R:GGTCAGCTTTCATCCTCGT    |                                                 |
|                                     |                         | Hbg1                          | GCTTCTGACACAACACTGTGTTCACTAGC                      |                                                 |
|                                     |                         | Hbg2                          | CACCAACTTCATCCAGTTACC                              |                                                 |

**Supplemental Table 3.** Primers used in this study. CSR, class switch recombination ; S $\mu$ -3'RRrec, S $\mu$ -3'RR recombination; IgH, immunoglobulin heavy chain, S, switch region; LS, like switch region, HS, hypersensitive site.

**Supplemental Figure Legends**

**Supplemental figure 1: Description of CLL PBMC samples. A.** Blood tumor infiltration in Chronic Lymphocytic Leukemia (CLL) (N=47) samples indicated by the percentage of CD5<sup>+</sup> CD19<sup>+</sup> B cells gated

on total CD19<sup>+</sup> B cells. **B.** S $\mu$ -3'RR recombination (S $\mu$ -3'RRrec) junctions were at comparable levels in both CLL samples (N=47, S $\mu$ -3'RRrec 1060 junctions) and healthy volunteer (HV) peripheral blood mononuclear cells (PBMCs) (N=9, 239 S $\mu$ -3'RRrec junctions). Unpaired T test, ns: no significant difference. **C.** Graphical representation of CLL cell percentages within total B-cells according to S $\mu$ -3'RRrec junction count for each sample demonstrated that S $\mu$ -3'RRrec counts were not dependent on CLL B-cell richness. **D.** Percentage of CD3<sup>+</sup> and CD19<sup>+</sup> cells among all lymphocytes and among all PBMC. S $\mu$ -3'RRrec<sup>Low</sup>, N=15; S $\mu$ -3'RRrec<sup>High</sup>, N=8. **E.** Kaplan Meyer curves of treatment free survival (TFS) (years) showed no significant differences between CSR<sup>Low</sup> (N=32, 8540 junctions) and CSR<sup>High</sup> (N=14, 22683 junctions) CLL patients, separated with a threshold of 800 class switch recombination (CSR) count ( $\approx$ 4.6 years compared to  $\approx$ 4.3 years; P=0.4420. Chi2 test).

**Supplemental figure 2 :** immunoglobulin heavy chain variable (IGHV) gene usage frequency in Chronic Lymphocytic Leukemia (CLL) in this study are represented in circle diagrams (A.). **B.** Analysis of immunoglobulin heavy chain variable (IGHV) usage is not significantly different between S $\mu$ -3'RRrec<sup>Low</sup> and S $\mu$ -3'RRrec<sup>High</sup> groups (Chi2 test). Absolute number of cases is indicated for each section.

**Supplemental figure 3: CD19 expression in normal and CLL B-cells.** **A.** CD19<sup>+</sup> transcript quantification relative to GAPDH expression in Chronic Lymphocytic Leukemia (CLL) peripheral blood mononuclear cells (PBMCs). S $\mu$ -3'RRrec<sup>Low</sup>, N=8; S $\mu$ -3'RRrec<sup>High</sup>, N=6. **B.** Mean fluorescence intensity (MFI) of CD19 at the B-cell surface appears comparable for CD5<sup>+</sup>CD19<sup>+</sup> tumor cells from both CLL groups (S $\mu$ -3'RRrec<sup>Low</sup>, N=14; S $\mu$ -3'RRrec<sup>High</sup>, N=7) and decreased, as expected, compared to normal CD5<sup>-</sup>CD19<sup>+</sup> B-cells from CLL patients. Statistical analyses were performed using the Unpaired T test, ns: no significant difference.

**Supplemental figure 4: B-cell numbers equivalent to DNA used for CSR and S $\mu$ -3'RRrec junctions.** Absolute number of CD19<sup>+</sup> B-cells corresponding to 600ng of peripheral blood mononuclear cells (PBMCs) DNA used for class switch recombination (CSR) and S $\mu$ -3'RR recombination (S $\mu$ -3'RRrec) amplification. S $\mu$ -3'RRrec<sup>Low</sup>, N=15; S $\mu$ -3'RRrec<sup>High</sup>, N=8. Unpaired T test, ns: no significant difference.

**Supplemental figure 5: Kaplan Meyer curves of TFS.** Kaplan Meyer curves of treatment free survival (TFS) (years) depending on immunoglobulin heavy chain variable (IGHV) mutation status (A.), Binet stage (B.), lymphocytosis (C.) and cytogenetics (D.) (Chi2 test).

**Supplemental references**

1. Gupta NT, Vander Heiden JA, Uduman M, Gadala-Maria D, Yaari G, Kleinstein SH. Change-O: a toolkit for analyzing large-scale B cell immunoglobulin repertoire sequencing data. *Bioinformatics* 2015;31(20):3356–3358.
2. Brochet X, Lefranc M-P, Giudicelli V. IMGT/V-QUEST: the highly customized and integrated system for IG and TR standardized V-J and V-D-J sequence analysis. *Nucleic Acids Res* 2008;36(Web Server issue):W503-508.
3. Yaari G, Vander Heiden JA, Uduman M, et al. Models of Somatic Hypermutation Targeting and Substitution Based on Synonymous Mutations from High-Throughput Immunoglobulin Sequencing Data. *Front Immunol* 2013;4:358.
4. Li H, Durbin R. Fast and accurate short read alignment with Burrows–Wheeler transform. *Bioinformatics* 2009;25(14):1754–1760.

# Supplemental Figure 1

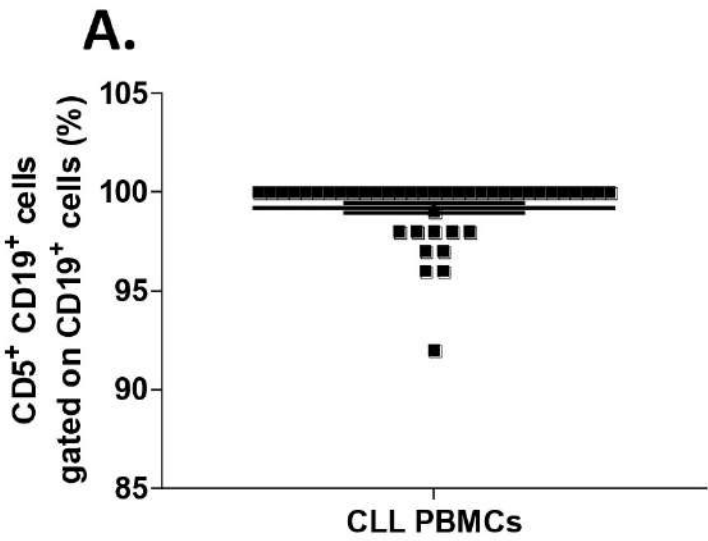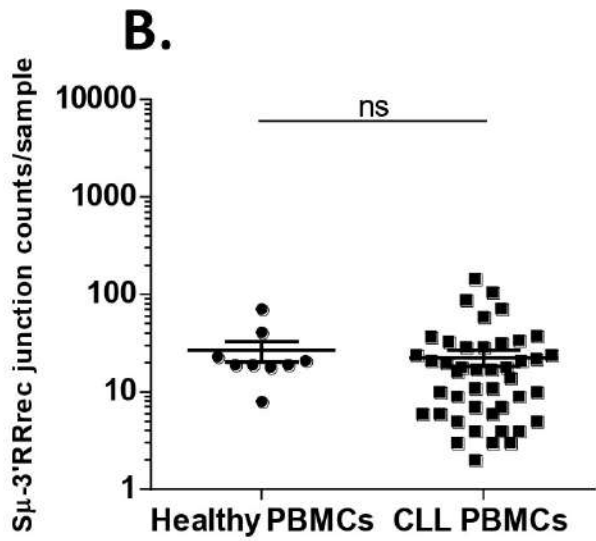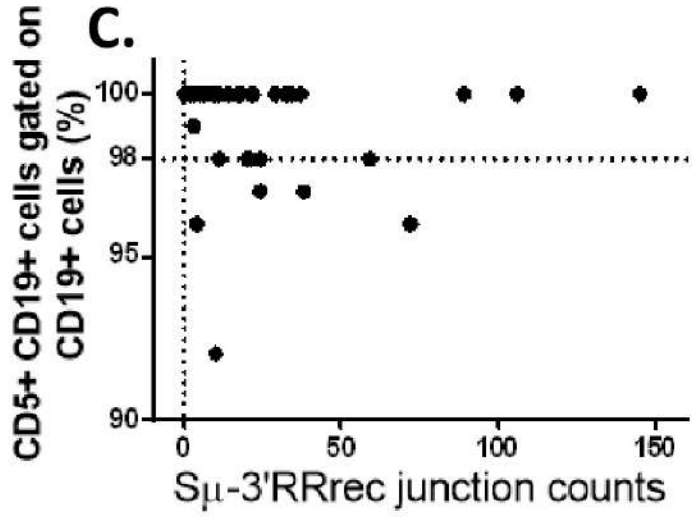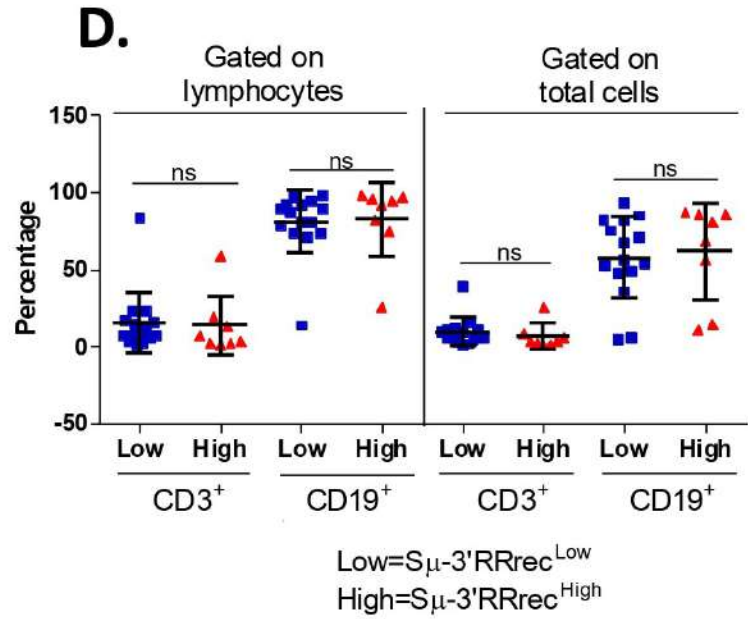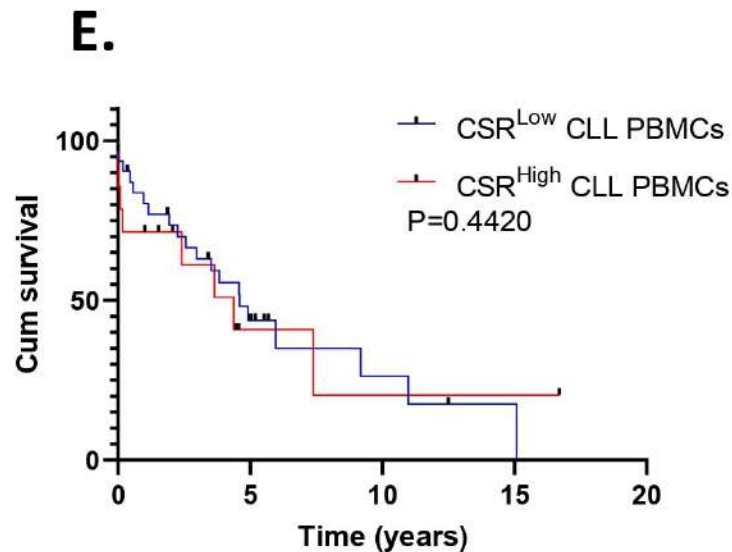

# Supplemental Figure 2

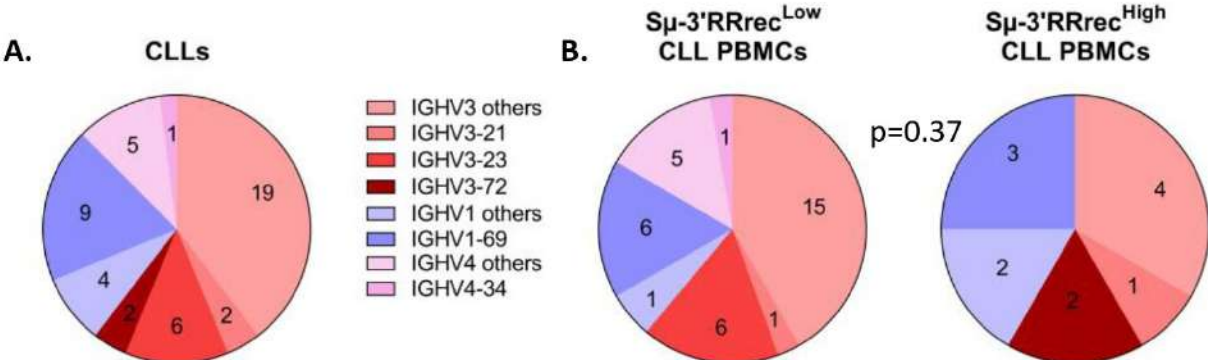



# Supplemental Figure 3

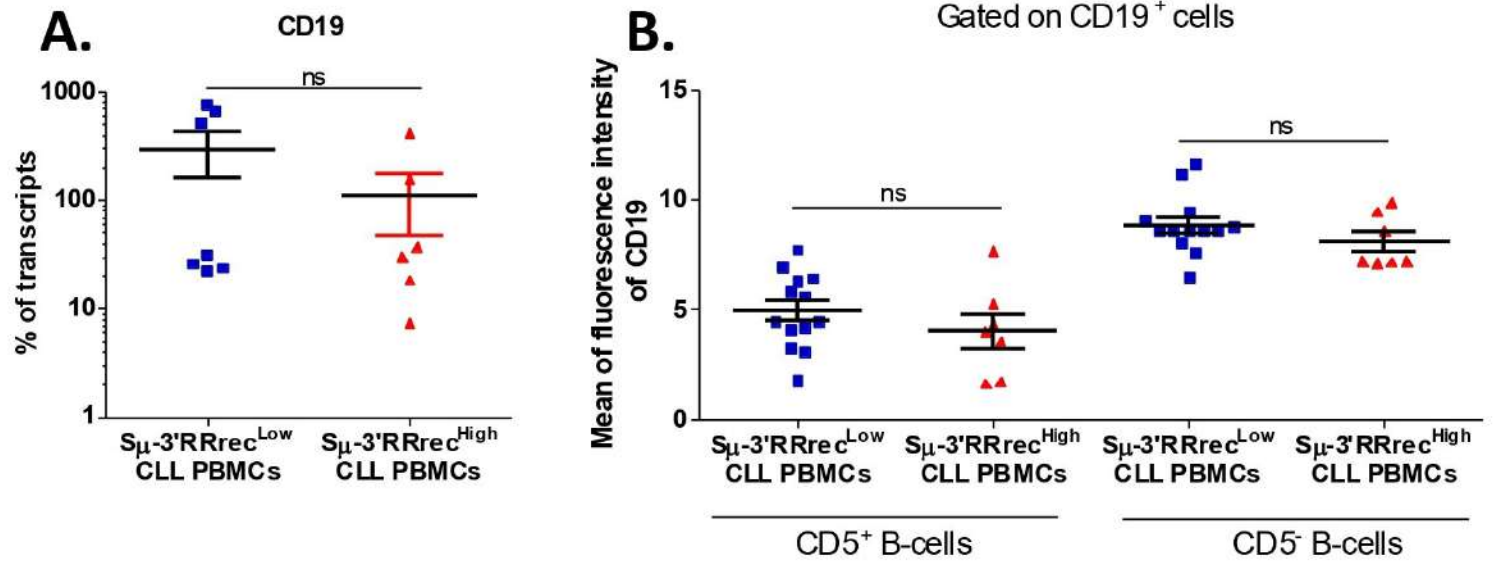

# Supplemental Figure 4

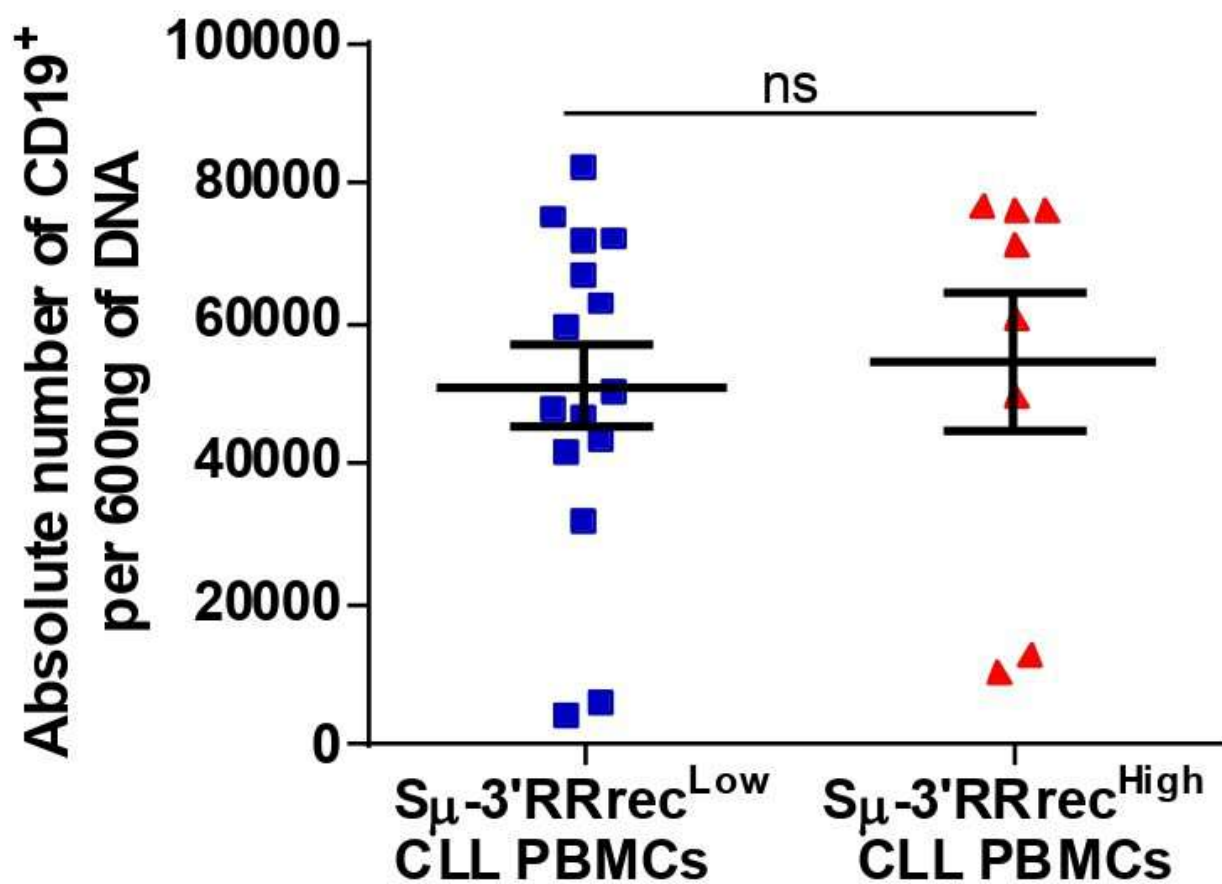

## Supplemental Figure 5

**A.**

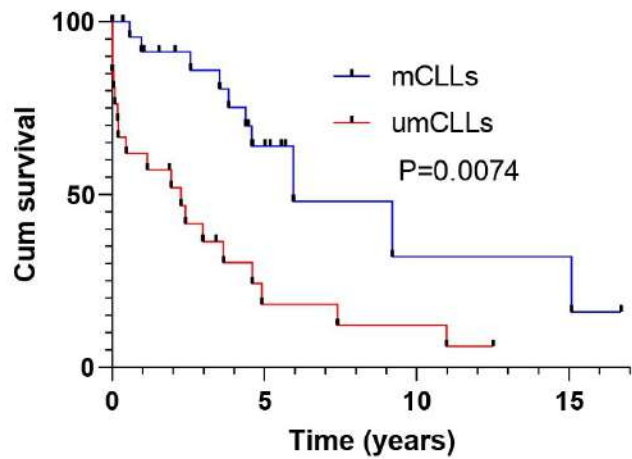

**B.**

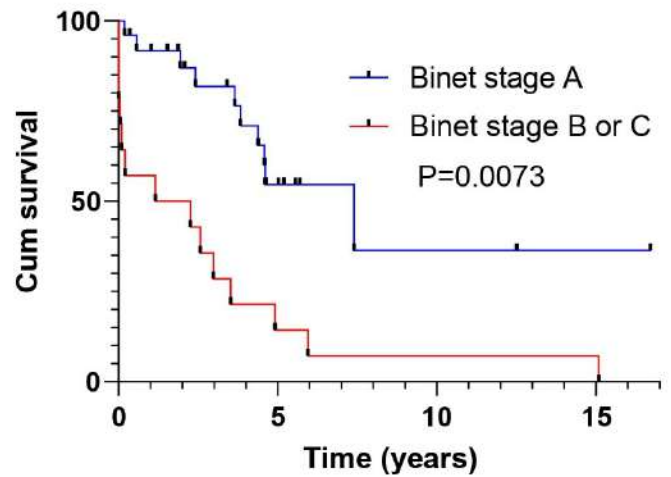

**C.**

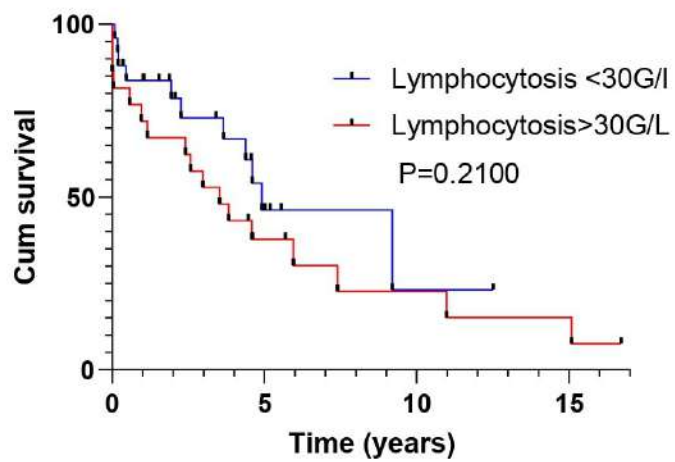

**D.**

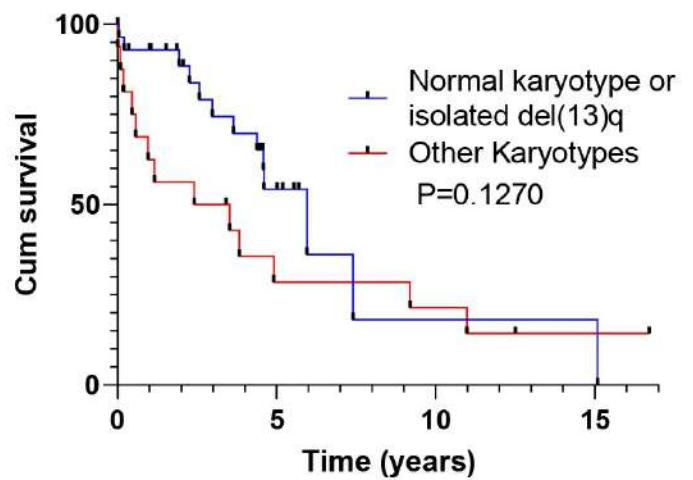

Supplement: 2023_282897_AL_JAMAL_SUPPL.pdf [file 2023_282897_AL_JAMAL_SUPPL.pdf]
